# Supplementary material
Source: PubMed Central journal article supplement (PMC2947353)
Supplement: blood-2007-11-120402_1.pdf [file blood-2007-11-120402_1.pdf]

|                                  | <i>Steap3</i> <sup>WT</sup><br>(n=8) | <i>Steap3</i> <sup>Y288H</sup><br>(n=7) | t-test  |
|----------------------------------|--------------------------------------|-----------------------------------------|---------|
| Hemoglobin(g/dl)                 | 13.00 +/-0.71                        | 9.66 +/-0.59                            | <0.0001 |
| WBCs (x10 <sup>3</sup> /ml)      | 6.23 +/-2.52                         | 8.99 +/-3.87                            | 0.1215  |
| Platelets (x10 <sup>6</sup> /ml) | 1201 +/-171.8                        | 1259 +/-105.8                           | 0.4     |
