# Supplementary material
Source: PubMed Central journal article supplement (PMC2947353)
Supplement: blood-2007-11-120402_2.pdf [file blood-2007-11-120402_2.pdf]

|                                | <i>Steap3</i> <sup>WT</sup><br>(n=9/*n=5) | <i>Steap3</i> <sup>Y288H</sup><br>(n=10/*n=5) | t-test |
|--------------------------------|-------------------------------------------|-----------------------------------------------|--------|
| Body Weight (g)                | 23.50 +/-4.2                              | 22.41 +/-3.51                                 | 0.5458 |
| Organ-body weight ratio (mg/g) |                                           |                                               |        |
| Liver                          | 53.71 +/-5.46                             | 52.98 +/-4.80                                 | 0.7616 |
| Spleen                         | 3.76 +/-0.51                              | 5.40 +/-1.57                                  | 0.0081 |
| Kidney                         | 13.60 +/-1.10                             | 14.83 +/-1.48                                 | 0.0574 |
| Testes                         | 6.08 +/-0.26*                             | 5.81 +/-0.52*                                 | 0.3291 |
| Thymus                         | 2.26 +/- 1.33                             | 2.72 +/-0.81                                  | 0.3006 |
| Heart                          | 4.87 +/-0.38                              | 5.70 +/-1.07                                  | 0.0421 |
| Brain                          | 18.52 +/-3.42                             | 18.68 +/-2.55                                 | 0.9037 |
